# Supplementary material for: Risk Estimation in Non-Enhancing Glioma: Introducing a Clinical Score
Source: MDPI journal article supplement (doi:10.3390/cancers15092503), 2023-04-27
Supplement: s1 [file s1]

## Supplementary Figures

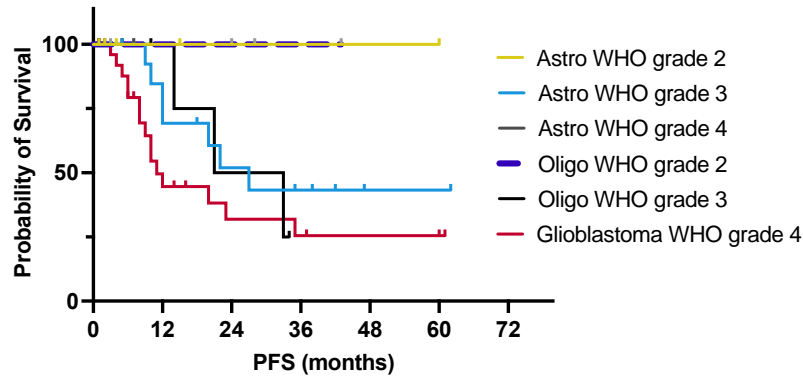

**Figure S1:** Kaplan Meier progression-free-survival (PFS) curves of the 72 patients of the discovery cohort. As expected IDH<sup>wt</sup> GBM patients WHO grade 4 had the shortest PFS, whereas IDH<sup>mut</sup> astrocytoma WHO grade 2 patient had the longest PFS.

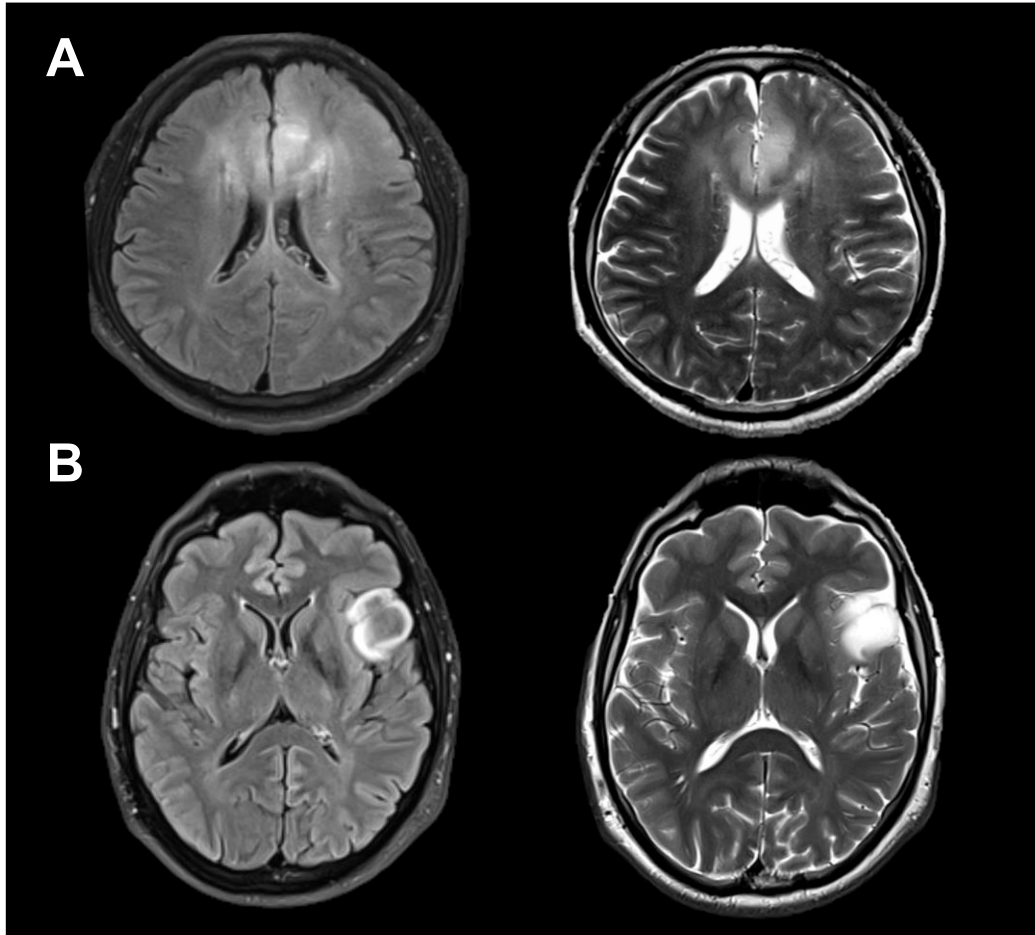

**Figure S2.** Two exemplary patients where the RENEG score is applied. **A.** 46-year-old male patient with an incidental bifrontal non-enhancing FLAIR lesion. A watch and wait strategy was adopted and the lesion was observed for three years until MRI progression. It involved the SVZ and had no T2/FLAIR mismatch sign therefore yielding a RENEG score of 0.61 making the lesion very likely to be classified as malignant. Indeed, postoperative histology revealed an IDH<sup>wt</sup> GBM WHO grade 4. **B.** 54-year-old male patient presenting with headaches. The frontal lesion was positive for the T2/FLAIR mismatch sign and did not contact the SVZ. Therefore, the calculated RENEG score is 0.19, making it very unlikely of being malignant. This was confirmed by histology (IDH<sup>mut</sup> astrocytoma WHO grade 2).
